# Supplementary material
Source: HighWire-hosted journal article supplement (https://www.annals.org/content/suppl/2003/07/10/136.9.652)
Supplement: 136-9-652-appendix.pdf [file 136-9-652-appendix.pdf]

**DATA DICTIONARY****ANNUAL PHYSICAL PATIENT QUESTIONNAIRE**

1. Form AP1 2. Date \_\_\_\_\_ 3. Set # AP1

Researchers from the University of Colorado Health Sciences Center are trying to determine people's beliefs about the effectiveness and use of some medical tests and procedures. We would appreciate your answering the following questions, which will only take a couple minutes of your time. Your answer will be confidential and your identity will remain anonymous.

4. Age: \_\_\_\_\_ 5. Sex: [ 1 ] Male [ 0 ] Female

6. Your usual source of medical care is: [ 1 ] no regular doctor

[ 2 ] private practice doctor

[ 3 ] HMO

[ 4 ] hospital based clinic

[ 5 ] community clinic

[ 6 ] other

7. How many times in the past twelve months have you seen your regular doctor?

[ 1 ] 0 [ 2 ] 1-2 [ 3 ] 3-5 [ 4 ] 6 or more

8. Do you smoke now? [ 1 ] Yes [ 2 ] No

9. Do you have lung disease? [ 1 ] Yes [ 2 ] No

10. Do you have heart disease? [ 1 ] Yes [ 2 ] No

11. Do you have diabetes? [ 1 ] Yes [ 2 ] No

12. Do you have cancer? [ 1 ] Yes [ 2 ] No

13. Do you have high blood pressure? [ 1 ] Yes [ 2 ] No

14. In addition to seeing my regular doctor when I am sick or for chronic medical problems, I need an annual physical exam. [ 1 ] Yes [ 2 ] No

**HISTORY**

A. During an annual physical, my doctor should ask me about my:

15. diet [ 1 ] Yes [ 2 ] No

16. exercise [ 1 ] Yes [ 2 ] No

17. job/career [ 1 ] Yes [ 2 ] No

18. tobacco use [ 1 ] Yes [ 2 ] No

19. alcohol use [ 1 ] Yes [ 2 ] No

20. marijuana/cocaine use [ 1 ] Yes [ 2 ] No

21. seatbelt use [ 1 ] Yes [ 2 ] No

22. sexual history [ 1 ] Yes [ 2 ] No

23. mental health, anxiety, or depression [ 1 ] Yes [ 2 ] No

B. During an annual physical exam, my doctor should perform these tests:

24. height/weight [ 1 ] Yes [ 2 ] No

25. blood pressure [ 1 ] Yes [ 2 ] No

26. vision [ 1 ] Yes [ 2 ] No

27. hearing [ 1 ] Yes [ 2 ] No

28. listen to heart [ 1 ] Yes [ 2 ] No

29. examine breasts (*women*) [ 1 ] Yes [ 2 ] No

30. pap smear (*women*) [ 1 ] Yes [ 2 ] No

31. examine abdomen [ 1 ] Yes [ 2 ] No

32. check reflexes [ 1 ] Yes [ 2 ] No

33. examine prostate (*men*) [ 1 ] Yes [ 2 ] No

**BLOOD TESTS**

34. In addition to seeing my regular doctor when I am sick or for chronic medical problems, I need one or more annual blood tests. [ 1 ] Yes [ 2 ] No

A. My doctor should order these blood tests annually:

35. blood count for anemia and other abnormalities [ 1 ] Yes [ 2 ] No

36. blood sugar for diabetes [ 1 ] Yes [ 2 ] No

37. blood cholesterol [ 1 ] Yes [ 2 ] No

38. blood test for prostate cancer (*men*) [ 1 ] Yes [ 2 ] No

39. blood test for HIV/AIDS [ 1 ] Yes [ 2 ] No

40. blood test for kidney and liver function [ 1 ] Yes [ 2 ] No

41. blood test for thyroid [ 1 ] Yes [ 2 ] No

**ANNUAL PROCEDURES**

42. In addition to seeing my regular doctor when I am sick or for chronic medical problems, I need one or more annual tests or procedures. [ 1 ] Yes [ 2 ] No

A. My doctor should order these tests or procedures annually:

43. urinalysis [ 1 ] Yes [ 2 ] No

44. chest x-ray [ 1 ] Yes [ 2 ] No

45. mammogram (*women*) [ 1 ] Yes [ 2 ] No

46. bone density test for osteoporosis (*women*) [ 1 ] Yes [ 2 ] No

47. electrocardiogram [ 1 ] Yes [ 2 ] No

48. treadmill cardiogram test [ 1 ] Yes [ 2 ] No

49. stool cards for blood [ 1 ] Yes [ 2 ] No

50. rectal exam with viewing instrument [ 1 ] Yes [ 2 ] No  
51. Race: [1] White [2] Hispanic [3] Black [4] Asian/Pacific Islander [5] Native American/Alaskan Indian [6] Other  
52. Family Income: [1] <\$30,000/yr [2] \$30,000-60,000/yr [3] >\$60,000  
53. Education: [1] <High School [2] High School [3] College [4] Beyond college

#### DATA DICTIONARY

#### ANNUAL PHYSICAL PATIENT QUESTIONNAIRE

1. Form AP1 2. Date \_\_\_\_\_ 3. Set # AP1

Researchers from the University of Colorado Health Sciences Center are trying to determine people's beliefs about the effectiveness and use of some medical tests and procedures. We would appreciate your answering the following questions, which will only take a couple minutes of your time. Your answer will be confidential and your identity will remain anonymous.

4. Age: \_\_\_\_\_ 5. Sex: [ 1 ] Male [ 0 ] Female
6. Your usual source of medical care is: [ 1 ] no regular doctor  
[ 2 ] private practice doctor  
[ 3 ] HMO  
[ 4 ] hospital based clinic  
[ 5 ] community clinic  
[ 6 ] other
7. How many times in the past twelve months have you seen your regular doctor?  
[ 1 ] 0 [ 2 ] 1-2 [ 3 ] 3-5 [ 4 ] 6 or more
8. Do you smoke now? [ 1 ] Yes [ 0 ] No
9. Do you have lung disease? [ 1 ] Yes [ 0 ] No
10. Do you have heart disease? [ 1 ] Yes [ 0 ] No
11. Do you have diabetes? [ 1 ] Yes [ 0 ] No
12. Do you have cancer? [ 1 ] Yes [ 0 ] No
13. Do you have high blood pressure? [ 1 ] Yes [ 0 ] No
14. In addition to seeing my regular doctor when I am sick or for chronic medical problems, I need an annual physical exam. [ 1 ] Yes [ 0 ] No If no, go to A 16.  
If yes: If you had to pay \$150, would you still want annual physical exam?  
15. [ 1 ] Yes [ 0 ] No
- A. In addition to seeing my regular doctor when I am sick or for chronic medical problems, I need the following tests every 1-3 years:
16. Cholesterol [ 1 ] Yes [ 0 ] No If no, go to 18.  
If yes: If you had to pay \$20, would you still want a cholesterol test?  
17. [ 1 ] Yes [ 0 ] No
18. HIV/AIDS test? [ 1 ] Yes [ 0 ] No If no, go to 20.  
If yes: If you had to pay \$60, would you still want a HIV/AIDS test?  
19. [ 1 ] Yes [ 0 ] No Go to 20.
20. Urinalysis? [ 1 ] Yes [ 0 ] No If no, go to 22.  
If yes: If you had to pay \$10, would you still want an urinalysis?  
21. [ 1 ] Yes [ 0 ] No Go to 22.
22. Blood sugar? [ 1 ] Yes [ 0 ] No If no, go to 24.  
If yes: If you had to pay \$20, would you still want a blood sugar?  
23. [ 1 ] Yes [ 0 ] No
24. Stool tests for blood? [ 1 ] Yes [ 0 ] No If no, go to 26.  
If yes: If you had to pay \$20, would you still want a stool test for blood?  
25. [ 1 ] Yes [ 0 ] No
26. Chest x-ray? [ 1 ] Yes [ 0 ] No If no, go to 28.  
If yes: If you had to pay \$125, would you still want a chest x-ray?  
27. [ 1 ] Yes [ 0 ] No
28. *(Women Only)*  
Mammogram [ 1 ] Yes [ 0 ] No If no, go to 30.  
If yes: If you had to pay \$160, would you still want a mammogram?  
29. [ 1 ] Yes [ 0 ] No Go to 30.
30. *(Women Only)*  
Pap smear [ 1 ] Yes [ 0 ] No If no, go to 34.  
If yes: If you had to pay \$150, would you still want a pap smear?  
31. [ 1 ] Yes [ 0 ] No Go to 34.
32. *(Men Only)*  
Blood test for prostate cancer (PSA)? [ 1 ] Yes [ 0 ] No If no, go to 34.  
If yes: If you had to pay \$50, would you still want the test?  
33. [ 1 ] Yes [ 0 ] No Go to 34.
34. Race: [ 1 ] White [ 2 ] Hispanic [ 3 ] Black [ 4 ] Asian/Pacific Islander  
[ 5 ] Native American/Alaskan Indian [ 6 ] Other
35. Family Income: [ 1 ] <\$30,000/yr. [ 2 ] \$30,000-\$60,000/yr. [ 3 ] >\$60,000/yr.
36. Education: [ 1 ] <High school [ 2 ] High school [ 3 ] College [ 4 ] Beyond college
